# Supplementary material for: Evaluation and selection of internal reference genes from two- and six-row U.S. malting barley varieties throughout micromalting for use in RT-qPCR
Source: PubMed Central journal article supplement (PMC5940201; doi:10.1371/journal.pone.0196966), 2018-05-08
Supplement: pone.0196966.s001.pdf [file pone.0196966.s001.pdf]

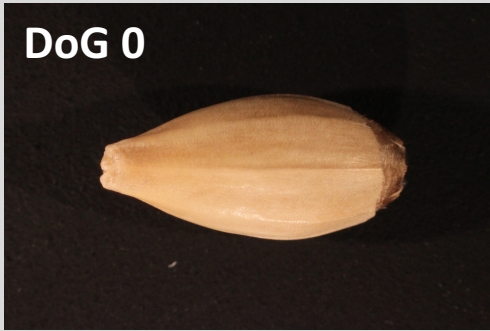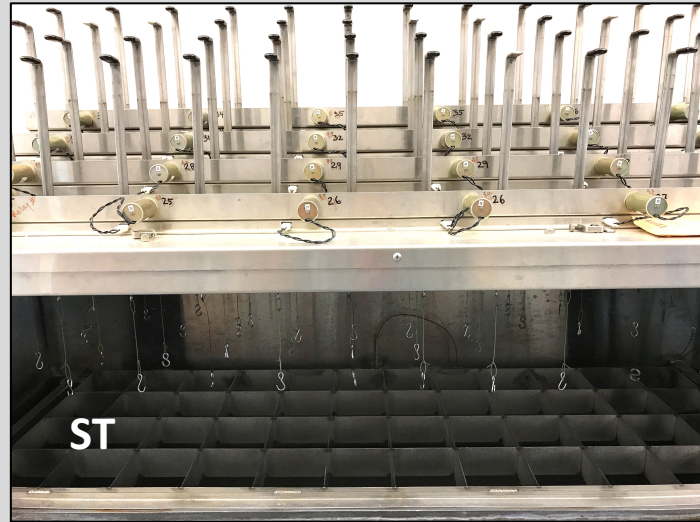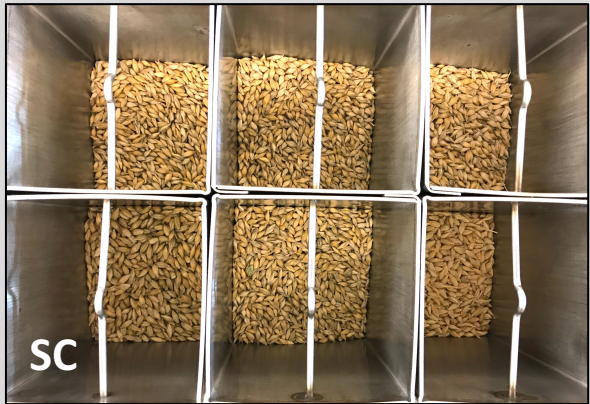

## Steep

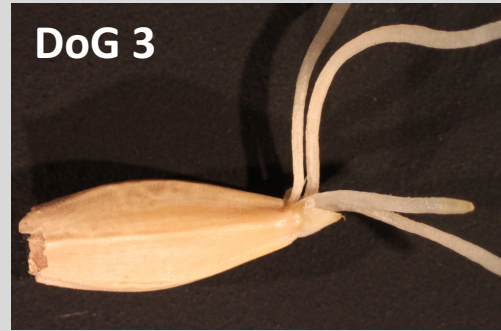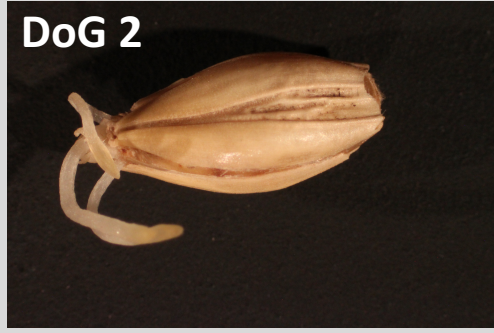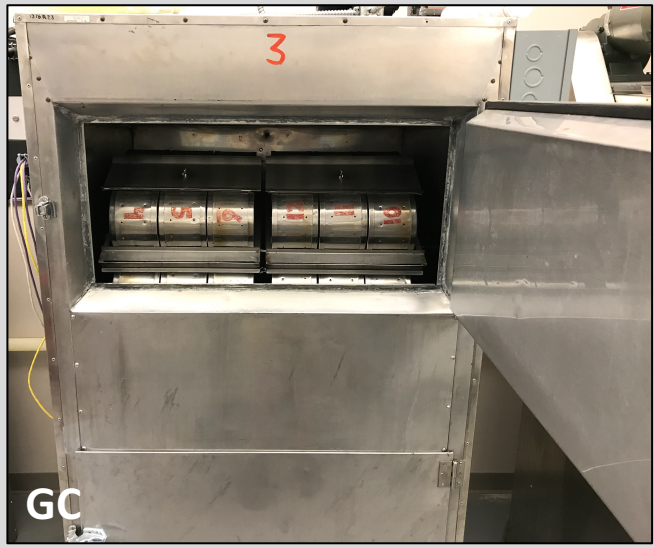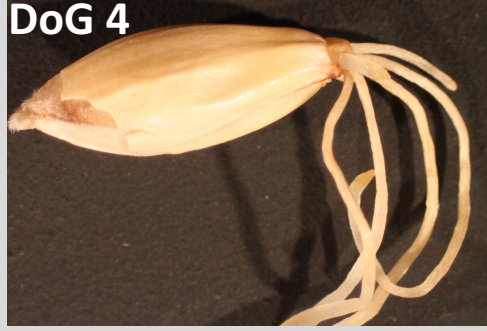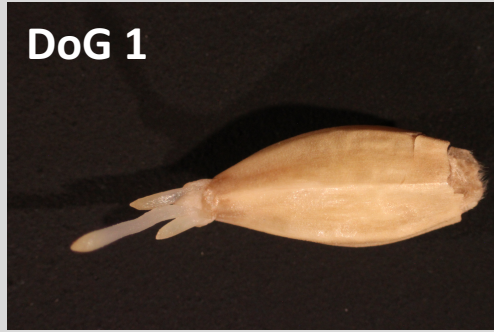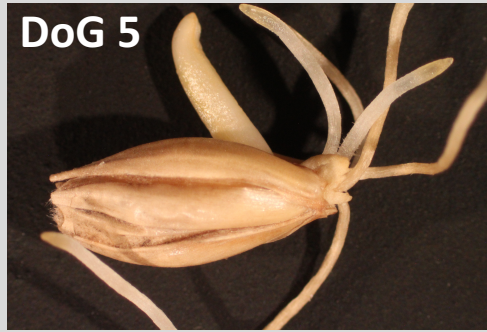

## Germination

**S1 Figure. Malting Process at CCRU.** Barley in Steeping Cans (SC) are imbibed for 36 hours in the Steep Tank (ST). Imbibed barley is transferred to a Germination Chamber (GC) where they continue to germinate for 5 days. DoG 1-5 = Days of Germination.
